# Supplementary material for: Automated Breast Cancer Detection in Digital Mammograms of Various Densities via Deep Learning
Source: PubMed Central journal article supplement (PMC7711783; doi:10.3390/jpm10040211), 2020-11-06
Supplement: jpm-10-00211-s001.pdf [file jpm-10-00211-s001.pdf]

**Supplementary Table 1.** Performance for breast cancer detection in mammograms by the DenseNet-169 model using age as a covariate

| Breast density | Accuracy (%) | Sensitivity (%) | Specificity (%) | PPV (%)     | NPV (%)     | AUC           |
|----------------|--------------|-----------------|-----------------|-------------|-------------|---------------|
| Overall        | 86.9 ± 1.1   | 86.4 ± 1.0      | 87.0 ± 1.1      | 59.4 ± 2.3  | 96.7 ± 0.3  | 0.953 ± 0.005 |
| Density A      | 95.0 ± 0.0   | 100 ± 0.0       | 92.9 ± 0.0      | 85.7 ± 0.0  | 100.0 ± 0.0 | 0.976 ± 0.012 |
| Density B      | 93.0 ± 6.1   | 90.9 ± 9.1      | 93.5 ± 5.7      | 77.0 ± 20.0 | 97.9 ± 2.1  | 0.989 ± 0.009 |
| Density C      | 85.8 ± 5.7   | 87.7 ± 2.1      | 85.4 ± 6.5      | 57.3 ± 11.1 | 97.0 ± 0.7  | 0.953 ± 0.014 |
| Density D      | 82.3 ± 8.6   | 80.0 ± 10.0     | 82.7 ± 8.3      | 48.2 ± 15.5 | 95.6 ± 2.5  | 0.899 ± 0.036 |
